# Supplementary material for: The clinical presentation of avoidant restrictive food intake disorder in children and adolescents is largely independent of sex, autism spectrum disorder and anxiety traits
Source: PubMed Central journal article supplement — eClinicalMedicine. 2023 Aug 30;63:102190. doi: 10.1016/j.eclinm.2023.102190 (PMC10480549; doi:10.1016/j.eclinm.2023.102190), 2023-08-30
Supplement: mmc1.pdf [file mmc1.pdf]

# **The clinical presentation of avoidant restrictive food intake disorder in children and adolescents is largely independent of sex, autism spectrum disorder and anxiety traits**

Rosie Watts, MSc<sup>1</sup>, Tanith Archibald, MSc<sup>2</sup>, Pippa Hembry, DClinPsy<sup>2</sup>, Maxine Howard, PhD<sup>2</sup>, Cate Kelly, MSc<sup>2</sup>, Rachel Loomes, DClinPsy<sup>2</sup>, Laura Markham, DClinPsy<sup>2</sup>, Harry Moss<sup>2</sup>, Alfonse Munuve, MSc<sup>2</sup>, Anca Oros, MD<sup>2</sup>, Amy Siddall, DipHE<sup>2</sup>, Charlotte Rhind, PhD<sup>2</sup>, Mohammed Uddin, MSc<sup>2</sup>, Zain Ahmad, MSc<sup>1</sup>, Rachel Bryant-Waugh, PhD<sup>2,3</sup>, Christopher Hübel, PhD<sup>1,2,4,5</sup>

## **Supplementary Material**

### **Contents**

|                                       |           |
|---------------------------------------|-----------|
| <b>Supplementary Material S1.....</b> | <b>2</b>  |
| <b>Supplementary Table S1.....</b>    | <b>6</b>  |
| <b>Supplementary Figure S1 .....</b>  | <b>8</b>  |
| <b>Supplementary Table S2.....</b>    | <b>9</b>  |
| <b>Supplementary Table S3.....</b>    | <b>10</b> |
| <b>Supplementary Table S4.....</b>    | <b>19</b> |

## Supplementary Material S1

### Pica, avoidant restrictive food intake disorder (ARFID), rumination disorder – ARFID – Questionnaire (PARDI-AR-Q)

P-AR-Q Parent 4+ V1.1

For office use - ID:

#### PARDI-AR-Q: Parent 4+

The following questions are about your child's eating – some ask about how things currently are, others ask about things over the past month or the past 3 months. Please tick the boxes that apply, or enter the information requested. **Please read each question carefully. Please answer all the questions. Thank you.**

1. Please fill in today's date: \_\_\_\_/\_\_\_\_/\_\_\_\_ (day/month/year)
2. Please fill in your child's date of birth: \_\_\_\_/\_\_\_\_/\_\_\_\_ (day/month/year)
3. Is your child? Male  Female  Other  \_\_\_\_\_
4. What is your child's height? (please enter numbers): feet  in  /OR metres  cm
5. What is your child's weight? (please enter numbers): lbs  /OR stones  lbs  /OR kg
6. Do you think your child has a problem with eating, involving avoidance or restriction of foods or their eating overall? Yes  No
7. Have other people (for example, doctors, family members, significant others) said that your child has a problem with eating, involving avoidance or restriction of foods or their eating overall? Yes  No
8. Have your child's eating habits led to difficulty maintaining a sufficient weight or, if they are still growing, difficulty gaining enough weight to keep pace with their growth? Yes  No
9. Have your child's eating habits led to them losing weight (in other words, if they have lost weight, this is because of avoidance or restriction and not because of a medical illness, or other reason)? Yes  No
10. If yes to #9 above, how much weight have they lost in the past 3 months? (please enter numbers): lbs  /OR stones  lbs  /OR kg  OR No weight loss over past 3 months
11. Have others (for example, doctors, family members) been concerned about your child's weight loss, or been concerned that they are having difficulty gaining enough weight to grow, or having difficulty maintaining their weight? Yes  No
12. Have others (for example, doctors, family members) been concerned that your child is not growing taller as they should? Yes  No  My child has finished growing
13. Have you ever been told by **any health professional** that due to their eating habits your child is not growing as expected, or that their height was less than it should be? Yes  No
14. Over the past month, has **any health professional** said that your child has a nutritional deficiency due to their eating habits (for example, low iron, low vitamin B12, low vitamin C)? Yes  No

©Rachel Bryant-Waugh, Kamryn Eddy, Nadia Micali, Lucy Cooke, Jennifer J. Thomas

Page 1 of 4 - Please turn to next page

15. Over the past month, has a **healthcare professional prescribed** special supplements (for example, pills, capsules, powders, or drinks containing vitamins and/or minerals and other micronutrients) **specifically to help with your child's nutrition**? Yes  No

16. If yes to #15 above, what has been prescribed and how much does your child take each day?  
\_\_\_\_\_

17. Over the past month, has a **healthcare professional prescribed** special supplements (for example, high-calorie drinks or 'shots', or dessert-style high-calorie supplements) **specifically to help your child maintain or gain weight**? Yes  No

18. If yes to #17 above, what has been prescribed and how much does your child take each day?  
\_\_\_\_\_

19. Is your child currently receiving any tube feeding (receiving food or fluid via a tube in their nose or into their stomach)? Yes  No

20. If yes to #19 above, what is the name of the **food or fluid product taken via the tube** and how much does your child take each day?  
\_\_\_\_\_

21. Does your child's eating cause them difficulties in daily functioning - that is, in how they are able to go about things each day? This might be at school/college/work or when at home. Yes  No

22. Does your child's eating cause them difficulties in interactions with other people (for example, disagreements or arguments with parents, siblings, significant others), or difficulty making or sustaining friendships or other close relationships?  
Please circle a number on the line below how difficult **interactions with other people** are for your child because of their eating, ranging from 0 (= no difficulty) to 6 (= extremely difficult)

0                      1                      2                      3                      4                      5                      6

\_\_\_\_\_→

23. Does your child's eating cause them difficulties in social situations, for example does it make it difficult for them to go out with friends, eat at school/college, or stay away from home?

Please circle a number on the line below how difficult **social situations** are for your child because of their eating, ranging from 0 (= no difficulty) to 6 (= extreme /tries to avoid all social situations)

0                      1                      2                      3                      4                      5                      6

\_\_\_\_\_→

24. Over the past month, has your child been particularly sensitive to variation in taste (for example, noticing slight differences in the taste of foods), which has put them off eating any foods or trying any new foods?

Please circle a number on the line below how much **sensitivity to taste** has affected your child's eating, ranging from 0 (= no negative effect/no particular sensitivity to taste) to 6 (= extremely negative effect, for example, leading to refusal to eat many foods, sticking only to a limited number of preferred foods, or extreme caution when eating )

0                      1                      2                      3                      4                      5                      6

\_\_\_\_\_→

25. Over the past month has your child been particularly sensitive to the texture or consistency of food, which has put them off eating any foods or trying any new foods (for example, does your child stick to foods of a certain texture only or have they had difficulty eating foods that have different textures mixed together such as pasta with sauce or sandwiches)?

Please circle a number on the line below how much **sensitivity to texture or consistency** has affected your child's eating, ranging from 0 (= no negative effect/no particular sensitivity) to 6 (=extremely negative effect, for example, leading to refusal to eat many foods, sticking only to a limited number of preferred foods, or extreme caution when eating)

0 1 2 3 4 5 6

26. Over the past month, has your child been particularly sensitive to the appearance of food, which has put them off eating any foods or trying any new foods (for example, if food does not look "right", such as burnt ends of chips/fries, broken biscuits/cookies, or being the "wrong" colour)?

Please circle a number on the line below how much **sensitivity to the appearance of food** has affected your child's eating, ranging from 0 (= no negative effect/no particular sensitivity) to 6 (=extremely negative effect, for example, leading to refusal to eat many foods, sticking only to a limited number of preferred foods, or extreme caution when eating)

0 1 2 3 4 5 6

27. Over the past month, how often has your child forgotten to eat or found it difficult to make time to eat?

Please circle a number on the line below how often your child has **forgotten to eat or found it difficult to make time to eat**, ranging from 0 (= never) to 6 (=always)

0 1 2 3 4 5 6

28. Over the past month, how often has your child appeared to enjoy food or eating (even if only a narrow range of foods)?

Please circle a number on the line below how often your child has **enjoyed food or eating**, ranging from 0 (= never) to 6 (=always)

0 1 2 3 4 5 6

29. Over the past month, how often has your child said or indicated they are full before their meal is finished, or stopped eating sooner than others because they had had enough?

Please circle a number on the line below how often your child has **indicated they are full or stopped eating early**, ranging from 0 (= never) to 6 (=always)

0 1 2 3 4 5 6

30. Over the past month has your child been avoiding or restricting the amount or type of food they eat, because they have said or indicated they were afraid that something bad might happen, like being sick, choking, having an allergic reaction, or being in pain?

Please circle a number on the line below how often being **afraid something bad might happen** has affected your child's eating, ranging from 0 (= never) to 6 (=always)

0 1 2 3 4 5 6

31. Over the past month has your child avoided eating situations because they said or indicated they were worried something bad might happen, like being sick, choking, having an allergic reaction, or being in pain while eating (for example, because they might be served something they usually avoid for these reasons, or because they have had a bad experience in the past)?

Please circle a number on the line below how often your child has **avoided eating situations** due to such worries, ranging from 0 (= never) to 6 (=always)

0                      1                      2                      3                      4                      5                      6



32. Over the past month has your child expressed any physical feelings of panic or anxiety (examples might include a racing heart, sweaty palms, feeling sick) when they have seen something that has made them think something bad might happen, like being sick, choking, having an allergic reaction, or being in pain while eating

Please circle a number on the line below how often your child had **had physical feelings of panic or anxiety** due to such thoughts, ranging from 0 (= never) to 6 (=always)

0                      1                      2                      3                      4                      5                      6



THANK YOU!

## Supplementary Table S1

Pairwise complete observations between correlations in the heterogenous correlation matrix (Figure 1) between symptoms of Avoidant Restrictive Food Intake Disorder (ARFID) measured on the PARDI-AR-Q, BMI-for-age z-scores and comorbid anxiety traits in a clinical sample of children and adolescents ARFID outpatients. Upper triangle = Percentage of missing data. Lower triangle = Number of pairwise complete observations.

| Variables                                 | 1   | 2     | 3     | 4     | 5     | 6     | 7     | 8     | 9     | 10    | 11    | 12    | 13    | 14    | 15    | 16    | 17    |
|-------------------------------------------|-----|-------|-------|-------|-------|-------|-------|-------|-------|-------|-------|-------|-------|-------|-------|-------|-------|
| 1.Social anxiety                          |     | 29.3% | 29.3% | 29.3% | 30.6% | 44.1% | 32.0% | 32.0% | 32.0% | 32.0% | 32.0% | 32.0% | 32.0% | 32.0% | 32.0% | 32.0% | 32.0% |
| 2.Generalised anxiety                     | 157 |       | 29.3% | 29.3% | 30.6% | 44.1% | 32.0% | 32.0% | 32.0% | 32.0% | 32.0% | 32.0% | 32.0% | 32.0% | 32.0% | 32.0% | 32.0% |
| 3.Separation anxiety                      | 157 | 157   |       | 29.3% | 30.6% | 44.1% | 32.0% | 32.0% | 32.0% | 32.0% | 32.0% | 32.0% | 32.0% | 32.0% | 32.0% | 32.0% | 32.0% |
| 4.Panic disorder                          | 157 | 157   | 157   |       | 30.6% | 44.1% | 32.0% | 32.0% | 32.0% | 32.0% | 32.0% | 32.0% | 32.0% | 32.0% | 32.0% | 32.0% | 32.0% |
| 5.BMI                                     | 154 | 154   | 154   | 154   |       | 20.7% | 5.0%  | 4.5%  | 4.5%  | 4.5%  | 4.5%  | 4.5%  | 4.5%  | 5.0%  | 4.5^  | 5.0%  | 5.0%  |
| 6.Nutritional deficiencies                | 124 | 124   | 124   | 124   | 176   |       | 17.1% | 17.1% | 17.1% | 17.1% | 17.1% | 17.1% | 17.1% | 17.1% | 17.1% | 17.1% | 17.1% |
| 7.Difficulty: interactions with others    | 151 | 151   | 151   | 151   | 211   | 184   |       | 0.5%  | 0.5%  | 0.5%  | 0.5%  | 0.5%  | 0.5%  | 0.5%  | 0.5%  | 0.5%  | 0.5%  |
| 8.Difficulty: social situations           | 151 | 151   | 151   | 151   | 212   | 184   | 221   |       | 0.0%  | 0.0%  | 0.0%  | 0.0%  | 0.0%  | 0.5%  | 0.0%  | 0.5%  | 0.5%  |
| 9.Sensory sensitivity: taste              | 151 | 151   | 151   | 151   | 212   | 184   | 221   | 222   |       | 0.0%  | 0.0%  | 0.0%  | 0.0%  | 0.5%  | 0.0%  | 0.5%  | 0.5%  |
| 10.Sensory sensitivity: consistency       | 151 | 151   | 151   | 151   | 212   | 184   | 221   | 222   | 222   |       | 0.0%  | 0.0%  | 0.0%  | 0.5%  | 0.0%  | 0.5%  | 0.5%  |
| 11.Sensory sensitivity: appearance        | 151 | 151   | 151   | 151   | 212   | 184   | 221   | 222   | 222   | 222   |       | 0.0%  | 0.0%  | 0.5%  | 0.0%  | 0.5%  | 0.5%  |
| 12.Lack interest: forgotten to eat        | 151 | 151   | 151   | 151   | 212   | 184   | 221   | 222   | 222   | 222   | 222   |       | 0.0%  | 0.5%  | 0.0%  | 0.5%  | 0.5%  |
| 13.Lack interest: no enjoyment in food    | 151 | 151   | 151   | 151   | 212   | 184   | 221   | 222   | 222   | 222   | 222   | 222   |       | 0.5%  | 0.0%  | 0.5%  | 0.5%  |
| 14.Lack interest: stopped eating early    | 151 | 151   | 151   | 151   | 211   | 184   | 221   | 221   | 221   | 221   | 221   | 221   | 221   |       | 0.5%  | 0.5%  | 0.5%  |
| 15.Concern: Afraid to eat                 | 151 | 151   | 151   | 151   | 212   | 184   | 221   | 222   | 222   | 222   | 222   | 222   | 222   | 221   |       | 0.5%  | 0.5%  |
| 16.Concern: Avoided eating situations     | 151 | 151   | 151   | 151   | 211   | 184   | 221   | 221   | 221   | 221   | 221   | 221   | 221   | 221   | 221   |       | 0.5%  |
| 17.Concern: Physical symptoms when eating | 151 | 151   | 151   | 151   | 211   | 184   | 221   | 221   | 221   | 221   | 221   | 221   | 221   | 221   | 221   | 221   |       |

BMI = Body Mass Index

## Supplementary Figure S1

Sensitivity analysis presenting female-only and male-only heterogeneous correlation matrices using pairwise complete observations between symptoms of ARFID measured on the PARDI-AR-Q, BMI-for-age z-scores and comorbid anxiety traits in a clinical sample of children and adolescents ARFID outpatients. This sensitivity analysis was computed to account for the potential confounding effect of sex on the associations between ARFID and symptoms. The number of pairwise complete observations for each individual correlation ranged from 72 - 112 in the female-only correlation matrix and 52 - 110 in the male only correlation matrix.

### Female-only correlation matrix

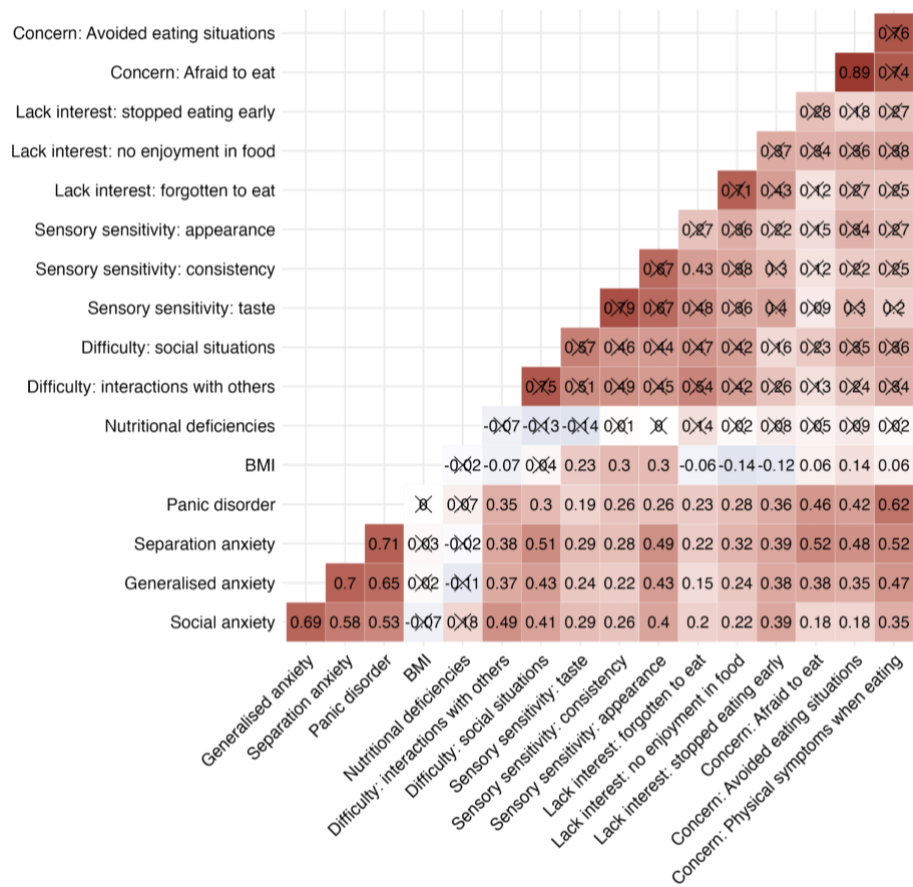

### Male-only correlation matrix

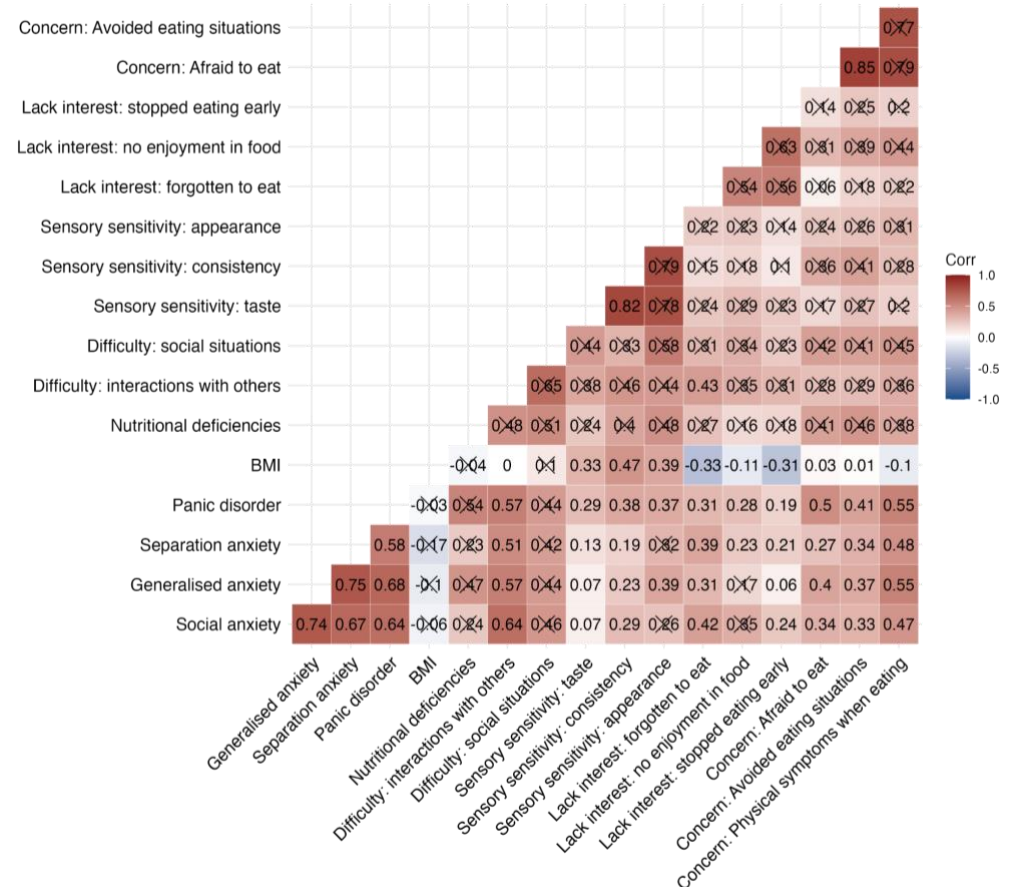

## Supplementary Table S2

Attrition analysis presenting patients included and patients excluded from the six regression analyses exploring associations between ARFID drivers (sensory sensitivities, lack of interest in eating and food, concern about aversive consequences when eating) and patients sex whilst adjusting for age, and patient ASD diagnosis whilst controlling for sex and age (Table 2).

| Characteristic               | Included patients<br>N = 221 <sup>1</sup> | Excluded patients<br>N = 40 <sup>1</sup> |
|------------------------------|-------------------------------------------|------------------------------------------|
| <b>Patient's sex</b>         |                                           |                                          |
| Male                         | 109 (49%)                                 | 19 (48%)                                 |
| Female                       | 112 (51%)                                 | 21 (52%)                                 |
| Not answered                 | 0                                         | 0                                        |
| <b>Age [years]</b>           |                                           |                                          |
|                              | 12.8 (9.4, 15.8)                          | 12.2 (7.1, 15.9)                         |
| Not answered                 | 0                                         | 8                                        |
| <b>ASD</b>                   |                                           |                                          |
| No ASD diagnosis             | 101 (46%)                                 | 26 (65%)                                 |
| Suspected ASD                | 51 (23%)                                  | 9 (22%)                                  |
| ASD                          | 69 (31%)                                  | 5 (12%)                                  |
| Not answered                 | 0                                         | 0                                        |
| <b>Sensory sensitivities</b> |                                           |                                          |
|                              | 14.0 (10.0, 18.0)                         | 18.0 (18.0, 18.0)                        |
| Not answered                 | 0                                         | 39                                       |



|                              |                  |             |
|------------------------------|------------------|-------------|
| <b>Lack of interest</b>      | 12.0 (9.0, 16.0) | NA (NA, NA) |
| Not answered                 | 0                | 40          |
| <b>Aversive consequences</b> | 7.0 (1.0, 14.0)  | NA (NA, NA) |
| Not answered                 | 0                | 40          |

---

<sup>1</sup>n (%); Median (IQR)

### Supplementary Table S3

Heterogeneous correlation matrix table (Figure 1). Pairwise complete observations between symptoms of Avoidant Restrictive Food Intake Disorder (ARFID) measured on the PARDI-AR-Q, BMI-for-age z-scores and comorbid anxiety traits in a clinical sample of children and adolescents ARFID outpatients.

| Variable 1                             | Variable 2          | Correlation | p-value  |
|----------------------------------------|---------------------|-------------|----------|
| Generalised anxiety                    | Social anxiety      | 0.71        | < 2e-16  |
| Separation anxiety                     | Social anxiety      | 0.63        | < 2e-16  |
| Panic disorder                         | Social anxiety      | 0.58        | 1.11e-15 |
| BMI                                    | Social anxiety      | -0.07       | 4.10e-01 |
| Nutritional deficiencies               | Social anxiety      | 0.21        | 3.14e-01 |
| Difficulty: interactions with others   | Social anxiety      | 0.53        | 9.28e-15 |
| Difficulty: social situations          | Social anxiety      | 0.43        | 3.23e-11 |
| Sensory sensitivity: taste             | Social anxiety      | 0.19        | 1.56e-09 |
| Sensory sensitivity: consistency       | Social anxiety      | 0.27        | 2.88e-13 |
| Sensory sensitivity: appearance        | Social anxiety      | 0.34        | 2.80e-11 |
| Lack interest: forgotten to eat        | Social anxiety      | 0.30        | 1.93e-13 |
| Lack interest: no enjoyment in food    | Social anxiety      | 0.27        | 1.03e-09 |
| Lack interest: stopped eating early    | Social anxiety      | 0.31        | 5.36e-11 |
| Concern: Afraid to eat                 | Social anxiety      | 0.23        | 5.64e-12 |
| Concern: Avoided eating situations     | Social anxiety      | 0.23        | 7.77e-12 |
| Concern: Physical symptoms when eating | Social anxiety      | 0.39        | 3.80e-16 |
| Separation anxiety                     | Generalised anxiety | 0.72        | < 2e-16  |
| Panic disorder                         | Generalised anxiety | 0.68        | < 2e-16  |
| BMI                                    | Generalised anxiety | -0.03       | 6.95e-01 |
| Nutritional deficiencies               | Generalised anxiety | 0.14        | 2.00e-01 |
| Difficulty: interactions with others   | Generalised anxiety | 0.45        | 8.72e-16 |
| Difficulty: social situations          | Generalised anxiety | 0.45        | 8.65e-12 |
| Sensory sensitivity: taste             | Generalised anxiety | 0.16        | 9.50e-10 |
| Sensory sensitivity: consistency       | Generalised anxiety | 0.22        | 8.05e-12 |
| Sensory sensitivity: appearance        | Generalised anxiety | 0.40        | 1.03e-11 |
| Lack interest: forgotten to eat        | Generalised anxiety | 0.22        | 6.55e-12 |
| Lack interest: no enjoyment in food    | Generalised anxiety | 0.22        | 3.41e-10 |
| Lack interest: stopped eating early    | Generalised anxiety | 0.25        | 1.82e-10 |
| Concern: Afraid to eat                 | Generalised anxiety | 0.38        | 2.38e-11 |
| Concern: Avoided eating situations     | Generalised anxiety | 0.36        | 1.39e-12 |
| Concern: Physical symptoms when eating | Generalised anxiety | 0.50        | 1.27e-14 |
| Panic disorder                         | Separation anxiety  | 0.65        | < 2e-16  |
| BMI                                    | Separation anxiety  | -0.07       | 3.64e-01 |
| Nutritional deficiencies               | Separation anxiety  | 0.11        | 3.12e-01 |
| Difficulty: interactions with others   | Separation anxiety  | 0.42        | 1.50e-13 |

|                                        |                          |       |          |
|----------------------------------------|--------------------------|-------|----------|
| Difficulty: social situations          | Separation anxiety       | 0.47  | 3.98e-12 |
| Sensory sensitivity: taste             | Separation anxiety       | 0.22  | 2.19e-12 |
| Sensory sensitivity: consistency       | Separation anxiety       | 0.23  | 4.56e-13 |
| Sensory sensitivity: appearance        | Separation anxiety       | 0.41  | 7.38e-12 |
| Lack interest: forgotten to eat        | Separation anxiety       | 0.29  | 3.31e-12 |
| Lack interest: no enjoyment in food    | Separation anxiety       | 0.27  | 1.97e-11 |
| Lack interest: stopped eating early    | Separation anxiety       | 0.29  | 2.66e-09 |
| Concern: Afraid to eat                 | Separation anxiety       | 0.37  | 1.20e-12 |
| Concern: Avoided eating situations     | Separation anxiety       | 0.39  | 2.52e-12 |
| Concern: Physical symptoms when eating | Separation anxiety       | 0.49  | 9.71e-15 |
| BMI                                    | Panic disorder           | -0.02 | 7.64e-01 |
| Nutritional deficiencies               | Panic disorder           | 0.25  | 3.75e-02 |
| Difficulty: interactions with others   | Panic disorder           | 0.44  | 2.83e-14 |
| Difficulty: social situations          | Panic disorder           | 0.39  | 3.56e-12 |
| Sensory sensitivity: taste             | Panic disorder           | 0.21  | 5.33e-12 |
| Sensory sensitivity: consistency       | Panic disorder           | 0.29  | 1.54e-14 |
| Sensory sensitivity: appearance        | Panic disorder           | 0.27  | 5.70e-12 |
| Lack interest: forgotten to eat        | Panic disorder           | 0.27  | 2.09e-13 |
| Lack interest: no enjoyment in food    | Panic disorder           | 0.29  | 1.18e-11 |
| Lack interest: stopped eating early    | Panic disorder           | 0.31  | 1.51e-10 |
| Concern: Afraid to eat                 | Panic disorder           | 0.49  | 9.82e-14 |
| Concern: Avoided eating situations     | Panic disorder           | 0.43  | 7.51e-14 |
| Concern: Physical symptoms when eating | Panic disorder           | 0.60  | < 2e-16  |
| Nutritional deficiencies               | BMI                      | -0.03 | 4.55e-01 |
| Difficulty: interactions with others   | BMI                      | -0.05 | 8.09e-10 |
| Difficulty: social situations          | BMI                      | 0.07  | 2.03e-03 |
| Sensory sensitivity: taste             | BMI                      | 0.30  | 1.81e-14 |
| Sensory sensitivity: consistency       | BMI                      | 0.42  | < 2e-16  |
| Sensory sensitivity: appearance        | BMI                      | 0.36  | 2.91e-13 |
| Lack interest: forgotten to eat        | BMI                      | -0.24 | < 2e-16  |
| Lack interest: no enjoyment in food    | BMI                      | -0.14 | 2.02e-01 |
| Lack interest: stopped eating early    | BMI                      | -0.27 | 6.09e-14 |
| Concern: Afraid to eat                 | BMI                      | 0.00  | 3.13e-11 |
| Concern: Avoided eating situations     | BMI                      | 0.02  | 2.23e-15 |
| Concern: Physical symptoms when eating | BMI                      | -0.05 | < 2e-16  |
| Difficulty: interactions with others   | Nutritional deficiencies | 0.18  | 6.02e-01 |
| Difficulty: social situations          | Nutritional deficiencies | 0.18  | 7.69e-01 |
| Sensory sensitivity: taste             | Nutritional deficiencies | 0.04  | 7.17e-01 |
| Sensory sensitivity: consistency       | Nutritional deficiencies | 0.20  | 1.07e-01 |
| Sensory sensitivity: appearance        | Nutritional deficiencies | 0.23  | 9.13e-01 |
| Lack interest: forgotten to eat        | Nutritional deficiencies | 0.19  | 4.45e-01 |

|                                        |                                      |      |          |
|----------------------------------------|--------------------------------------|------|----------|
| Lack interest: no enjoyment in food    | Nutritional deficiencies             | 0.09 | 8.20e-02 |
| Lack interest: stopped eating early    | Nutritional deficiencies             | 0.12 | 5.26e-01 |
| Concern: Afraid to eat                 | Nutritional deficiencies             | 0.23 | 7.27e-01 |
| Concern: Avoided eating situations     | Nutritional deficiencies             | 0.27 | 2.48e-01 |
| Concern: Physical symptoms when eating | Nutritional deficiencies             | 0.20 | 2.22e-01 |
| Difficulty: social situations          | Difficulty: interactions with others | 0.70 | 3.26e-03 |
| Sensory sensitivity: taste             | Difficulty: interactions with others | 0.43 | 7.04e-01 |
| Sensory sensitivity: consistency       | Difficulty: interactions with others | 0.45 | 2.39e-01 |
| Sensory sensitivity: appearance        | Difficulty: interactions with others | 0.43 | 7.40e-01 |
| Lack interest: forgotten to eat        | Difficulty: interactions with others | 0.50 | 4.76e-03 |
| Lack interest: no enjoyment in food    | Difficulty: interactions with others | 0.39 | 2.75e-01 |
| Lack interest: stopped eating early    | Difficulty: interactions with others | 0.31 | 5.00e-02 |
| Concern: Afraid to eat                 | Difficulty: interactions with others | 0.22 | 8.52e-04 |
| Concern: Avoided eating situations     | Difficulty: interactions with others | 0.28 | 2.32e-02 |
| Concern: Physical symptoms when eating | Difficulty: interactions with others | 0.36 | 5.89e-01 |
| Sensory sensitivity: taste             | Difficulty: social situations        | 0.50 | 4.86e-02 |
| Sensory sensitivity: consistency       | Difficulty: social situations        | 0.39 | 2.49e-01 |
| Sensory sensitivity: appearance        | Difficulty: social situations        | 0.50 | 4.87e-02 |
| Lack interest: forgotten to eat        | Difficulty: social situations        | 0.40 | 3.66e-03 |
| Lack interest: no enjoyment in food    | Difficulty: social situations        | 0.38 | 4.21e-03 |
| Lack interest: stopped eating early    | Difficulty: social situations        | 0.20 | 2.22e-01 |
| Concern: Afraid to eat                 | Difficulty: social situations        | 0.32 | 1.30e-01 |
| Concern: Avoided eating situations     | Difficulty: social situations        | 0.38 | 4.15e-02 |
| Concern: Physical symptoms when eating | Difficulty: social situations        | 0.40 | 4.28e-01 |
| Sensory sensitivity: consistency       | Sensory sensitivity: taste           | 0.79 | 3.44e-05 |
| Sensory sensitivity: appearance        | Sensory sensitivity: taste           | 0.73 | 2.17e-02 |
| Lack interest: forgotten to eat        | Sensory sensitivity: taste           | 0.35 | 7.12e-02 |
| Lack interest: no enjoyment in food    | Sensory sensitivity: taste           | 0.30 | 1.03e-01 |
| Lack interest: stopped eating early    | Sensory sensitivity: taste           | 0.29 | 7.82e-02 |
| Concern: Afraid to eat                 | Sensory sensitivity: taste           | 0.11 | 1.81e-02 |
| Concern: Avoided eating situations     | Sensory sensitivity: taste           | 0.26 | 1.06e-03 |
| Concern: Physical symptoms when eating | Sensory sensitivity: taste           | 0.19 | 5.91e-01 |
| Sensory sensitivity: appearance        | Sensory sensitivity: consistency     | 0.73 | 1.04e-04 |
| Lack interest: forgotten to eat        | Sensory sensitivity: consistency     | 0.26 | 1.53e-03 |

|                                        |                                     |      |          |
|----------------------------------------|-------------------------------------|------|----------|
| Lack interest: no enjoyment in food    | Sensory sensitivity: consistency    | 0.25 | 2.80e-03 |
| Lack interest: stopped eating early    | Sensory sensitivity: consistency    | 0.17 | 4.70e-01 |
| Concern: Afraid to eat                 | Sensory sensitivity: consistency    | 0.21 | 1.87e-02 |
| Concern: Avoided eating situations     | Sensory sensitivity: consistency    | 0.28 | 4.72e-02 |
| Concern: Physical symptoms when eating | Sensory sensitivity: consistency    | 0.24 | 8.35e-01 |
| Lack interest: forgotten to eat        | Sensory sensitivity: appearance     | 0.22 | 3.60e-02 |
| Lack interest: no enjoyment in food    | Sensory sensitivity: appearance     | 0.27 | 5.50e-01 |
| Lack interest: stopped eating early    | Sensory sensitivity: appearance     | 0.15 | 6.45e-02 |
| Concern: Afraid to eat                 | Sensory sensitivity: appearance     | 0.16 | 1.58e-01 |
| Concern: Avoided eating situations     | Sensory sensitivity: appearance     | 0.27 | 1.94e-02 |
| Concern: Physical symptoms when eating | Sensory sensitivity: appearance     | 0.27 | 3.80e-01 |
| Lack interest: no enjoyment in food    | Lack interest: forgotten to eat     | 0.63 | 2.72e-01 |
| Lack interest: stopped eating early    | Lack interest: forgotten to eat     | 0.51 | 2.42e-02 |
| Concern: Afraid to eat                 | Lack interest: forgotten to eat     | 0.12 | 2.05e-01 |
| Concern: Avoided eating situations     | Lack interest: forgotten to eat     | 0.25 | 1.01e-01 |
| Concern: Physical symptoms when eating | Lack interest: forgotten to eat     | 0.25 | 1.38e-03 |
| Lack interest: stopped eating early    | Lack interest: no enjoyment in food | 0.53 | 3.77e-02 |
| Concern: Afraid to eat                 | Lack interest: no enjoyment in food | 0.34 | 3.44e-02 |
| Concern: Avoided eating situations     | Lack interest: no enjoyment in food | 0.39 | 4.87e-01 |
| Concern: Physical symptoms when eating | Lack interest: no enjoyment in food | 0.42 | 1.22e-02 |
| Concern: Afraid to eat                 | Lack interest: stopped eating early | 0.23 | 2.44e-03 |
| Concern: Avoided eating situations     | Lack interest: stopped eating early | 0.24 | 1.46e-02 |
| Concern: Physical symptoms when eating | Lack interest: stopped eating early | 0.26 | 2.47e-02 |
| Concern: Avoided eating situations     | Concern: Afraid to eat              | 0.87 | 6.11e-08 |
| Concern: Physical symptoms when eating | Concern: Afraid to eat              | 0.77 | 7.70e-03 |
| Concern: Physical symptoms when eating | Concern: Avoided eating situations  | 0.77 | 2.66e-02 |

PARDI-AR-Q = Pica, ARFID, Rumination Disorder Interview – ARFID – Questionnaire; BMI = Body Mass Index

## Supplementary Table S4

Descriptive statistics of avoidant restrictive food intake disorder (ARFID) symptoms and age by ASD diagnosis and biological sex of children and adolescent ARFID outpatients.

| Characteristic                                          | No ASD diagnosis |                  |                  | Suspected ASD |                   |                   | ASD |                   |                   |
|---------------------------------------------------------|------------------|------------------|------------------|---------------|-------------------|-------------------|-----|-------------------|-------------------|
|                                                         | N                | Male, N = 57     | Female, N = 70   | N             | Male, N = 32      | Female, N = 28    | N   | Male, N = 39      | Female, N = 35    |
| <b>Avoidance of food based on sensory sensitivities</b> | 102              |                  |                  | 51            |                   |                   | 69  |                   |                   |
| Mean (SD)                                               |                  | 12.3 (5.6)       | 11.0 (5.3)       |               | 13.3 (5.5)        | 12.9 (4.8)        |     | 14.9 (4.6)        | 14.1 (5.4)        |
| Median (IQR)                                            |                  | 13.0 (8.8, 18.0) | 12.0 (6.0, 15.0) |               | 15.0 (10.5, 18.0) | 14.0 (11.0, 16.2) |     | 18.0 (13.0, 18.0) | 16.0 (14.0, 18.0) |
| Unknown                                                 |                  | 9                | 16               |               | 5                 | 4                 |     | 4                 | 1                 |
| <b>Lack of interest in eating and food</b>              | 101              |                  |                  | 51            |                   |                   | 69  |                   |                   |
| Mean (SD)                                               |                  | 10.0 (4.8)       | 11.9 (4.1)       |               | 11.4 (4.8)        | 13.1 (5.0)        |     | 12.0 (4.9)        | 14.1 (3.7)        |
| Median (IQR)                                            |                  | 10.0 (7.0, 14.0) | 13.0 (9.0, 15.0) |               | 12.0 (9.5, 15.0)  | 14.0 (10.8, 17.2) |     | 13.0 (8.5, 16.0)  | 15.0 (12.0, 17.0) |
| Unknown                                                 |                  | 10               | 16               |               | 5                 | 4                 |     | 4                 | 1                 |

|                                                      |                  |                   |                  |                  |                  |                   |  |
|------------------------------------------------------|------------------|-------------------|------------------|------------------|------------------|-------------------|--|
| <b>Concern about aversive consequences of eating</b> | 101              |                   | 51               |                  | 69               |                   |  |
| Mean (SD)                                            | 5.1 (5.7)        | 8.4 (6.5)         | 7.3 (6.8)        | 9.8 (6.9)        | 8.1 (6.6)        | 9.8 (6.7)         |  |
| Median (IQR)                                         | 3.0 (0.0, 8.0)   | 7.5 (3.0, 14.8)   | 4.0 (0.0, 14.5)  | 10.5 (3.2, 16.2) | 9.0 (2.0, 14.0)  | 12.0 (3.2, 15.8)  |  |
| Unknown                                              | 10               | 16                | 5                | 4                | 4                | 1                 |  |
| <b>Patient's age (years)</b>                         | 123              |                   | 58               |                  | 72               |                   |  |
| Mean (SD)                                            | 10.7 (3.9)       | 13.5 (3.6)        | 11.1 (4.8)       | 12.0 (3.5)       | 12.0 (4.2)       | 13.3 (3.8)        |  |
| Median (IQR)                                         | 10.5 (7.7, 14.1) | 14.8 (10.5, 16.2) | 10.2 (6.7, 15.8) | 12.7 (9.7, 14.2) | 12.8 (8.8, 15.6) | 13.8 (11.5, 16.2) |  |
| Unknown                                              | 0                | 4                 | 1                | 1                | 2                | 0                 |  |

---

ASD = autism spectrum disorder; N = number; SD = standard deviation; IQR = interquartile range
